# Supplementary material for: Impacts of COVID-19 on Nutritional Intake in Rural China: Panel Data Evidence
Source: Preprints.org preprint supplement (doi:10.20944/preprints202206.0067.v1), 2022-06-06
Supplement: Supplementary file 1 [file supplementary]

**Table S1.** Estimation results of the COVID-19 impact on dietary energy intake by income groups.

| **Variables** | **Low Income** | **Middle Income** | **High Income** |
| --- | --- | --- | --- |
| *Covid* | -0.0202** | -0.0113 | -0.0123* |
|  | (0.0094) | (0.0075) | (0.0064) |
| *lnPrice_energy* | -0.51*** | -0.47*** | -0.37*** |
|  | (0.06) | (0.15) | (0.08) |
| *lnExp* | 1.86 | 3.50* | 3.27** |
|  | (1.59) | (2.11) | (1.36) |
| *lnExpsq* | -0.08 | -0.15 | -0.15** |
|  | (0.08) | (0.10) | (0.07) |
| *Family_size* | -0.09*** | -0.07*** | -0.05* |
|  | (0.02) | (0.03) | (0.03) |
| Constant | -6.61 | -16.19 | -12.91* |
|  | (8.36) | (11.19) | (6.86) |
| Observations | 1,754 | 1,754 | 1,754 |
| R-squared | 0.97 | 0.96 | 0.97 |
| Year FE | YES | YES | YES |
| Household FE | YES | YES | YES |
| County FE | YES | YES | YES |
| Province FE | YES | YES | YES |
| Cluster | Village | Village | Village |

Notes: Standard errors in parentheses; * *p* < 0.10, ** *p* < 0.05, *** *p* < 0.01.

**Table S2.** Estimation results of the COVID-19 impact on carbohydrate intake by income groups.

| **Variables** | **Low Income** | **Middle Income** | **High Income** |
| --- | --- | --- | --- |
| *Covid* | -0.0157* | -0.00988 | -0.0104* |
|  | (0.0083) | (0.0077) | (0.0058) |
| *lnPrice_ch* | -0.83*** | -0.85*** | -0.80*** |
|  | (0.08) | (0.10) | (0.11) |
| *lnPrice_fat* | 0.25*** | 0.20 | 0.45*** |
|  | (0.08) | (0.15) | (0.11) |
| *lnPrice_pt* | 0.16 | 0.25 | 0.09 |
|  | (0.11) | (0.21) | (0.20) |
| *lnExp* | 1.80 | 3.00 | 3.95*** |
|  | (1.55) | (2.38) | (1.44) |
| *lnExpsq* | -0.078 | -0.12 | -0.18** |
|  | (0.08) | (0.11) | (0.07) |
| *Family_size* | -0.09*** | -0.06* | -0.06* |
|  | (0.03) | (0.03) | (0.03) |
| Constant | -7.49 | -15.28 | -18.00** |
|  | (8.07) | (12.53) | (7.30) |
| Observations | 1,754 | 1,754 | 1,754 |
| R-squared | 0.99 | 0.99 | 0.99 |
| Year FE | YES | YES | YES |
| Household FE | YES | YES | YES |
| County FE | YES | YES | YES |
| Province FE | YES | YES | YES |
| Cluster robust standard errors | Village | Village | Village |

Notes: Standard errors in parentheses; * *p* < 0.10, ** *p* < 0.05, *** *p* < 0.01.

**Table S3.** Estimation results of the COVID-19 impact on fat intake by income groups.

| **Variables** | **Low Income** | **Middle Income** | **High Income** |
| --- | --- | --- | --- |
| *Covid* | -0.0231** | -0.0125 | -0.0125** |
|  | (0.0091) | (0.0077) | (0.0055) |
| *lnPrice_ch* | 0.13* | 0.10 | 0.14 |
|  | (0.07) | (0.08) | (0.10) |
| *lnPrice_fat* | -0.84*** | -0.86*** | -0.64*** |
|  | (0.07) | (0.15) | (0.11) |
| *lnPrice_pt* | 0.21** | 0.32* | 0.18 |
|  | (0.09) | (0.19) | (0.20) |
| *lnExp* | 1.81 | 3.49 | 3.36** |
|  | (1.57) | (2.26) | (1.34) |
| *lnExpsq* | -0.08 | -0.15 | -0.15** |
|  | (0.08) | (0.11) | (0.07) |
| *Family_size* | -0.09*** | -0.06** | -0.06* |
|  | (0.03) | (0.03) | (0.03) |
| Constant | -7.80 | -17.71 | -15.03** |
|  | (8.23) | (11.82) | (6.80) |
| Observations | 1,754 | 1,754 | 1,754 |
| R-squared | 0.97 | 0.97 | 0.98 |
| Year FE | YES | YES | YES |
| Household FE | YES | YES | YES |
| County FE | YES | YES | YES |
| Province FE | YES | YES | YES |
| Cluster robust standard errors | Village | Village | Village |

Notes: Standard errors in parentheses; * *p* < 0.10, ** *p* < 0.05, *** *p* < 0.01.

**Table S4.** Estimation results of the COVID-19 impact on protein intake by income groups.

| **Variables** | **Low Income** | **Middle Income** | **High Income** |
| --- | --- | --- | --- |
| *Covid* | -0.0174* | -0.00410 | -0.00508 |
|  | (0.0091) | (0.0069) | (0.0050) |
| *lnPrice_ch* | 0.11 | 0.01 | 0.11 |
|  | (0.08) | (0.08) | (0.11) |
| *lnPrice_fat* | 0.25*** | 0.19 | 0.46*** |
|  | (0.07) | (0.15) | (0.11) |
| *lnPrice_pt* | -0.75*** | -0.51*** | -0.79*** |
|  | (0.10) | (0.17) | (0.19) |
| *lnExp* | 1.39 | 3.44 | 3.87** |
|  | (1.54) | (2.12) | (1.58) |
| *lnExpsq* | -0.06 | -0.15 | -0.18** |
|  | (0.07) | (0.10) | (0.08) |
| *Family_size* | -0.10*** | -0.06* | -0.05* |
|  | (0.03) | (0.03) | (0.03) |
| Constant | -5.35 | -16.66 | -17.10** |
|  | (7.98) | (11.00) | (7.99) |
| Observations | 1,754 | 1,754 | 1,754 |
| R-squared | 0.98 | 0.97 | 0.98 |
| Year FE | YES | YES | YES |
| Household FE | YES | YES | YES |
| County FE | YES | YES | YES |
| Province FE | YES | YES | YES |
| Cluster robust standard errors | Village | Village | Village |

Notes: Standard errors in parentheses; * *p* < 0.10, ** *p* < 0.05, *** *p* < 0.01.
